# Supplementary material for: Effect of Temporal and Spatial Smoothing on Speckle–Tracking-Derived Strain in Neonates
Source: Springer Nature journal article supplement (doi:10.1007/s00246-020-02536-3), 2021-01-25
Supplement: MOESM1 [file 18798122]

# **Effect of Temporal and Spatial Smoothing on Speckle Tracking Derived Strain in Neonates**

Umael Khan<sup>\*</sup>, Tom R. Omdal<sup>† ‡</sup>, Gottfried Greve<sup>† ‡</sup>, Ketil Grong<sup>\*</sup>, Knut Matre<sup>\*</sup>

<sup>\*</sup> Department of Clinical Science, University of Bergen, Bergen, Norway

<sup>†</sup> Department of Heart Disease, Haukeland University Hospital, Bergen, Norway

<sup>‡</sup> WestPaedResearch, Department of Clinical Science, University of Bergen, Bergen, Norway

Corresponding author: Umael Khan, Department of Clinical Science, Jonas Lies veg 87, NO 5021 Bergen, Norway; telephone +4797521090; E-mail [umael@hotmail.com](mailto:umael@hotmail.com)

**Supplementary table 1: Effect of smoothing on 4 chamber average longitudinal strain**

| Layer       | Complete set of strain values at all combinations of spatial and temporal smoothing (%) |           |           |           | P values for overall effects of smoothing ( $p \leq 0.05$ highlighted in bold type) | Statistically significant mean changes in strain (%) with changing spatial and temporal smoothing settings, alongside 95% confidence intervals of these mean differences. Non-significant changes not included.                 |
|-------------|-----------------------------------------------------------------------------------------|-----------|-----------|-----------|-------------------------------------------------------------------------------------|---------------------------------------------------------------------------------------------------------------------------------------------------------------------------------------------------------------------------------|
| Endocardial |                                                                                         | <b>TL</b> | <b>TD</b> | <b>TH</b> | $p_i=0.304$<br>$p_s=0.001$<br>$p_t=0.015$                                           | Spatial smoothing (no interaction with temporal smoothing):<br>SL-SD: 0.3 (95% CI 0.1 to 0.5)<br>SL-SH: 0.4 (95% CI 0.1 to 0.7)<br><br>Temporal smoothing (average across spatial smoothing):<br>TL-TD: 0.1 (95% CI 0.0 to 0.1) |
|             | <b>SL</b>                                                                               | -22.3±2.5 | -22.3±2.5 | -22.3±2.5 |                                                                                     |                                                                                                                                                                                                                                 |
|             | <b>SD</b>                                                                               | -22.6±2.6 | -22.5±2.5 | -22.6±2.5 |                                                                                     |                                                                                                                                                                                                                                 |
|             | <b>SH</b>                                                                               | -22.7±2.7 | -22.7±2.7 | -22.7±2.6 |                                                                                     |                                                                                                                                                                                                                                 |
| Midwall     |                                                                                         | <b>TL</b> | <b>TD</b> | <b>TH</b> | $p_i=0.041$<br>$p_s=0.168$<br>$p_t=0.039$                                           | Temporal smoothing (provided spatial smoothing set at default)<br>TL-TH: 0.1 (95% CI 0.0 to 0.1)                                                                                                                                |
|             | <b>SL</b>                                                                               | -19.9±2.3 | -19.8±2.2 | -19.9±2.2 |                                                                                     |                                                                                                                                                                                                                                 |
|             | <b>SD</b>                                                                               | -20.0±2.4 | -20.0±2.4 | -19.9±2.4 |                                                                                     |                                                                                                                                                                                                                                 |
|             | <b>SH</b>                                                                               | -20.1±2.5 | -20.0±2.5 | -20.0±2.5 |                                                                                     |                                                                                                                                                                                                                                 |
| Epicardial  |                                                                                         | <b>TL</b> | <b>TD</b> | <b>TH</b> | $p_i=0.113$<br>$p_s=0.680$<br>$p_t=0.017$                                           | Temporal smoothing (no interaction with spatial smoothing)<br>TL-TD*                                                                                                                                                            |
|             | <b>SL</b>                                                                               | -17.9±2.1 | -17.8±2.1 | -17.8±2.1 |                                                                                     |                                                                                                                                                                                                                                 |
|             | <b>SD</b>                                                                               | -17.8±2.3 | -17.8±2.3 | -17.8±2.3 |                                                                                     |                                                                                                                                                                                                                                 |
|             | <b>SH</b>                                                                               | -17.8±2.5 | -17.8±2.4 | -17.8±2.4 |                                                                                     |                                                                                                                                                                                                                                 |

CI: Confidence Interval;  $p_i$ : p-value for interaction between spatial and temporal smoothing;  $p_s$ : p-value for spatial smoothing;  $p_t$ : p-value for temporal smoothing; TD: Temporal smoothing default; TH: Temporal smoothing high; TL: Temporal smoothing low; SD: Spatial smoothing default; SH: Spatial smoothing high; SL: Spatial smoothing low \*The difference between the segments was less than 0.1%, yet still statistically significant.

**Supplementary table 2: Effect of smoothing on endocardial longitudinal strain**

| Segment      | Complete set of strain values at all combinations of spatial and temporal smoothing (%) |           |           |           | P values for overall effects of smoothing ( $p \leq 0.05$ highlighted in bold type)             | Statistically significant mean changes in strain (%) with changing spatial and temporal smoothing settings, alongside 95% confidence intervals of these mean differences. Non-significant changes not included.                                                                                                                                                                                  |
|--------------|-----------------------------------------------------------------------------------------|-----------|-----------|-----------|-------------------------------------------------------------------------------------------------|--------------------------------------------------------------------------------------------------------------------------------------------------------------------------------------------------------------------------------------------------------------------------------------------------------------------------------------------------------------------------------------------------|
| Basoseptal   |                                                                                         | <b>TL</b> | <b>TD</b> | <b>TH</b> | <b><math>p_s=0.001</math></b><br><b><math>p_t=0.043</math></b><br><b><math>p_i=0.035</math></b> | Spatial smoothing (across all temporal smoothing setting):<br>SL-SD:-2.6 (95%CI: -1.5 to 3.7)<br>SL-SH:-2.3(95%CI: -1.1-3.6)<br>Temporal smoothing (provided spatial smoothing set at default):<br>TL-TD:-0.1(95%CI -0.1 to 0.0)<br>TL-TH:-0.1(95%CI -0.2 to 0.0)<br>TD-TH*<br>Temporal smoothing (provided spatial smoothing set at high):<br>TL-TD*<br>TL-TH:-0.1(95%CI -0.1 to 0.0)<br>TD-TH* |
|              | <b>SL</b>                                                                               | -20.8±5.1 | -20.7±5.1 | -20.7±5.1 |                                                                                                 |                                                                                                                                                                                                                                                                                                                                                                                                  |
|              | <b>SD</b>                                                                               | -18.2±3.6 | -18.1±3.6 | -18.1±3.6 |                                                                                                 |                                                                                                                                                                                                                                                                                                                                                                                                  |
|              | <b>SH</b>                                                                               | -18.5±3.4 | -18.4±3.3 | -18.4±3.3 |                                                                                                 |                                                                                                                                                                                                                                                                                                                                                                                                  |
| Midseptal    |                                                                                         | <b>TL</b> | <b>TD</b> | <b>TH</b> | <b><math>p_s &lt; 0.001</math></b><br>$p_t=0.342$<br>$p_i=0.279$                                | Spatial smoothing (across all temporal smoothing setting):<br>SL-SD:2.0 (95%CI:1.3 to 2.8)<br>SL-SH:3.2(95%CI: 2.2 to 4.2)<br>SD-SH:1.2(95%CI: 0.9 to 1.5)                                                                                                                                                                                                                                       |
|              | <b>SL</b>                                                                               | -18.0±3.1 | -18.0±3.1 | -18.0±3.1 |                                                                                                 |                                                                                                                                                                                                                                                                                                                                                                                                  |
|              | <b>SD</b>                                                                               | -20.0±2.8 | -20.0±2.8 | -20.0±2.8 |                                                                                                 |                                                                                                                                                                                                                                                                                                                                                                                                  |
|              | <b>SH</b>                                                                               | -21.2±2.9 | -21.2±2.9 | -21.2±2.9 |                                                                                                 |                                                                                                                                                                                                                                                                                                                                                                                                  |
| Apicoseptal  |                                                                                         | <b>TL</b> | <b>TD</b> | <b>TH</b> | <b><math>p_s &lt; 0.001</math></b><br>$p_t=0.460$<br>$p_i=0.892$                                | Spatial smoothing (across all temporal smoothing setting):<br>SL-SD:-2.7 (95%CI: -3.4 to -2.0)<br>SL-SH:-4.7 (95%CI: -5.7 to -3.6)<br>SD-SH:-2.0 (95%CI: -1.5 to -2.4)                                                                                                                                                                                                                           |
|              | <b>SL</b>                                                                               | -35.6±6.1 | -35.6±6.1 | -35.6±6.1 |                                                                                                 |                                                                                                                                                                                                                                                                                                                                                                                                  |
|              | <b>SD</b>                                                                               | -32.9±5.6 | -32.9±5.6 | -32.9±5.6 |                                                                                                 |                                                                                                                                                                                                                                                                                                                                                                                                  |
|              | <b>SH</b>                                                                               | -30.9±5.2 | -30.9±5.2 | -30.9±5.2 |                                                                                                 |                                                                                                                                                                                                                                                                                                                                                                                                  |
| Apicolateral |                                                                                         | <b>TL</b> | <b>TD</b> | <b>TH</b> | $p_s=0.060$<br>$p_t=0.070$<br>$p_i=0.800$                                                       |                                                                                                                                                                                                                                                                                                                                                                                                  |
|              | <b>SL</b>                                                                               | -30.9±4.1 | -30.9±4.1 | -30.9±4.1 |                                                                                                 |                                                                                                                                                                                                                                                                                                                                                                                                  |
|              | <b>SD</b>                                                                               | -31.4±4.6 | -31.3±4.6 | -31.3±4.6 |                                                                                                 |                                                                                                                                                                                                                                                                                                                                                                                                  |
|              | <b>SH</b>                                                                               | -30.3±4.8 | -30.3±4.8 | -30.3±4.8 |                                                                                                 |                                                                                                                                                                                                                                                                                                                                                                                                  |
| Midlateral   |                                                                                         | <b>TL</b> | <b>TD</b> | <b>TH</b> | <b><math>p_s=0.001</math></b><br>$p_t=0.441$<br>$p_i=0.479$                                     | Spatial smoothing (across all temporal smoothing setting):<br>SL-SH:1.5 (95%CI: 0.4 to 2.6)<br>SD-SH:1.4 (95%CI: 0.9 to 1.9)                                                                                                                                                                                                                                                                     |
|              | <b>SL</b>                                                                               | -17.8±4.3 | -17.7±4.2 | -17.8±4.2 |                                                                                                 |                                                                                                                                                                                                                                                                                                                                                                                                  |
|              | <b>SD</b>                                                                               | -17.9±3.5 | -17.8±3.5 | -17.9±3.5 |                                                                                                 |                                                                                                                                                                                                                                                                                                                                                                                                  |
|              | <b>SH</b>                                                                               | -19.3±3.3 | -19.3±3.3 | -19.3±3.3 |                                                                                                 |                                                                                                                                                                                                                                                                                                                                                                                                  |
| Basolateral  |                                                                                         | <b>TL</b> | <b>TD</b> | <b>TH</b> | $p_s=0.135$<br>$p_t=0.829$<br>$p_i=0.425$                                                       |                                                                                                                                                                                                                                                                                                                                                                                                  |
|              | <b>SL</b>                                                                               | -13.6±4.7 | -13.6±4.8 | -13.6±4.8 |                                                                                                 |                                                                                                                                                                                                                                                                                                                                                                                                  |
|              | <b>SD</b>                                                                               | -13.2±4.0 | -13.2±4.0 | -13.2±4.0 |                                                                                                 |                                                                                                                                                                                                                                                                                                                                                                                                  |

|  |           |           |           |           |  |  |
|--|-----------|-----------|-----------|-----------|--|--|
|  | <b>SH</b> | -14.0±3.8 | -14.0±3.8 | -14.0±3.8 |  |  |
|--|-----------|-----------|-----------|-----------|--|--|

CI: Confidence Interval;  $p_i$ : p-value for interaction between spatial and temporal smoothing;  
 $p_s$ : p-value for spatial smoothing;  $p_t$ : p-value for temporal smoothing; TD: Temporal  
smoothing default; TH: Temporal smoothing high; TL: Temporal smoothing low; SD: Spatial  
smoothing default; SH: Spatial smoothing high; SL: Spatial smoothing low

\*The difference between the segments was less than 0.1%. yet still statistically significant.

**Supplementary table 3: Effect of smoothing on midwall longitudinal strain**

| Segment      | Complete set of strain values at all combinations of spatial and temporal smoothing (%) |           |           |           | P values for overall effects of smoothing ( $p \leq 0.05$ highlighted in bold type)    | Statistically significant mean changes in strain (%) with changing spatial and temporal smoothing settings, alongside 95% confidence intervals of these mean differences. Non-significant changes not included.                                                                                                                                                                                                                                                                                                                                                                                                                                                                                                         |
|--------------|-----------------------------------------------------------------------------------------|-----------|-----------|-----------|----------------------------------------------------------------------------------------|-------------------------------------------------------------------------------------------------------------------------------------------------------------------------------------------------------------------------------------------------------------------------------------------------------------------------------------------------------------------------------------------------------------------------------------------------------------------------------------------------------------------------------------------------------------------------------------------------------------------------------------------------------------------------------------------------------------------------|
| Basoseptal   |                                                                                         | <b>TL</b> | <b>TD</b> | <b>TH</b> | <b><math>p_s &lt; 0.001</math></b><br>$p_t = 0.068$<br><b><math>p_i = 0.005</math></b> | Spatial smoothing (temporal smoothing low)<br>SL-SD: -2.4(95%CI: -3.2 to -1.6)<br>SL-SH: -1.9(95%CI: -2.8 to -1.0)<br>SD-SH: 0.4(95%CI: -0.2 to -0.7)<br>Spatial smoothing (temporal smoothing default)<br>SL-SD: -2.4(95%CI: -3.2 to -1.6)<br>SL-SH: -1.9(95%CI: -2.8 to -1.0)<br>SD-SH: 0.4(95%CI: -0.2 to -0.7)<br>Spatial smoothing (temporal smoothing default)<br>SL-SD: -2.4(95%CI: -3.2 to -1.6)<br>SL-SH: -2.0(95%CI: -2.8 to -1.1)<br>SD-SH: 0.4(95%CI: -0.2 to -0.7)<br>Temporal smoothing (spatial smoothing default)<br>TL-TD: -0.1(95%CI: 0.0 to -0.1)<br>TL-TH: -0.1(95%CI: 0.0 to -0.2)<br>TD-TH*<br>Temporal smoothing (spatial smoothing high)<br>TL-TD*<br>TL-TH: -0.1(95%CI: 0.0 to -0.1)<br>TD-TH* |
|              | <b>SL</b>                                                                               | -19.3±4.1 | -19.3±4.1 | -19.3±4.1 |                                                                                        |                                                                                                                                                                                                                                                                                                                                                                                                                                                                                                                                                                                                                                                                                                                         |
|              | <b>SD</b>                                                                               | -17.0±3.3 | -16.9±3.3 | -16.9±3.2 |                                                                                        |                                                                                                                                                                                                                                                                                                                                                                                                                                                                                                                                                                                                                                                                                                                         |
|              | <b>SH</b>                                                                               | -17.4±3.1 | -17.3±3.1 | -17.3±3.1 |                                                                                        |                                                                                                                                                                                                                                                                                                                                                                                                                                                                                                                                                                                                                                                                                                                         |
| Midseptal    |                                                                                         | <b>TL</b> | <b>TD</b> | <b>TH</b> | <b><math>p_s &lt; 0.001</math></b><br>$p_t = 0.241$<br>$p_i = 0.293$                   | Spatial smoothing (across all temporal smoothing setting):<br>SL-SD: 1.4 (95%CI: 0.8 to 2.0)<br>SL-SH: 1.9 (95%CI: 1.0 to 2.7)<br>SD-SH*                                                                                                                                                                                                                                                                                                                                                                                                                                                                                                                                                                                |
|              | <b>SL</b>                                                                               | -17.8±2.7 | -17.7±2.8 | -17.8±2.8 |                                                                                        |                                                                                                                                                                                                                                                                                                                                                                                                                                                                                                                                                                                                                                                                                                                         |
|              | <b>SD</b>                                                                               | -19.2±2.6 | -19.2±2.6 | -19.2±2.6 |                                                                                        |                                                                                                                                                                                                                                                                                                                                                                                                                                                                                                                                                                                                                                                                                                                         |
|              | <b>SH</b>                                                                               | -19.7±2.7 | -19.6±2.7 | -19.6±2.7 |                                                                                        |                                                                                                                                                                                                                                                                                                                                                                                                                                                                                                                                                                                                                                                                                                                         |
| Apicoseptal  |                                                                                         | <b>TL</b> | <b>TD</b> | <b>TH</b> | <b><math>p_s &lt; 0.001</math></b><br>$p_t = 0.373$<br>$p_i = 0.279$                   | Spatial smoothing (across all temporal smoothing setting):<br>SL-SD: -2.3 (95%CI: -3.0 to -1.7)<br>SL-SH: -3.9 (95%CI: -4.9 to -3.0)<br>SD-SH: -1.6 (95%CI: -1.9 to -1.6)                                                                                                                                                                                                                                                                                                                                                                                                                                                                                                                                               |
|              | <b>SL</b>                                                                               | -28.5±4.8 | -28.5±4.7 | -28.5±4.7 |                                                                                        |                                                                                                                                                                                                                                                                                                                                                                                                                                                                                                                                                                                                                                                                                                                         |
|              | <b>SD</b>                                                                               | -26.1±5.0 | -26.1±4.9 | -26.1±4.9 |                                                                                        |                                                                                                                                                                                                                                                                                                                                                                                                                                                                                                                                                                                                                                                                                                                         |
|              | <b>SH</b>                                                                               | -24.5±4.9 | -24.5±4.9 | -24.5±4.9 |                                                                                        |                                                                                                                                                                                                                                                                                                                                                                                                                                                                                                                                                                                                                                                                                                                         |
| Apicolateral |                                                                                         | <b>TL</b> | <b>TD</b> | <b>TH</b> | $p_s = 0.068$<br>$p_t = 0.061$<br>$p_i = 0.688$                                        |                                                                                                                                                                                                                                                                                                                                                                                                                                                                                                                                                                                                                                                                                                                         |
|              | <b>SL</b>                                                                               | -23.9±3.6 | -23.9±3.6 | -23.9±3.6 |                                                                                        |                                                                                                                                                                                                                                                                                                                                                                                                                                                                                                                                                                                                                                                                                                                         |
|              | <b>SD</b>                                                                               | -24.6±4.1 | -24.6±4.0 | -24.6±4.0 |                                                                                        |                                                                                                                                                                                                                                                                                                                                                                                                                                                                                                                                                                                                                                                                                                                         |
|              | <b>SH</b>                                                                               | -23.8±4.3 | -23.8±4.3 | -23.8±4.3 |                                                                                        |                                                                                                                                                                                                                                                                                                                                                                                                                                                                                                                                                                                                                                                                                                                         |
| Midlateral   |                                                                                         | <b>TL</b> | <b>TD</b> | <b>TH</b> |                                                                                        |                                                                                                                                                                                                                                                                                                                                                                                                                                                                                                                                                                                                                                                                                                                         |

|             |           |           |           |           |                                         |                                                                                                                                |
|-------------|-----------|-----------|-----------|-----------|-----------------------------------------|--------------------------------------------------------------------------------------------------------------------------------|
|             | <b>SL</b> | -16.4±4.0 | -16.4±4.0 | -16.4±4.0 | <b>ps=0.003</b><br>pt=0.196<br>pi=0.685 | Spatial smoothing (across all temporal smoothing setting):<br>SL-SH: 1.3 (95%CI: 0.2 to 2.3)<br>SD-SH: 0.9 (95%CI: 0.5 to 1.4) |
|             | <b>SD</b> | -16.8±3.2 | -16.7±3.2 | -16.8±3.2 |                                         |                                                                                                                                |
|             | <b>SH</b> | -17.7±3.0 | -17.7±3.0 | -17.7±3.0 |                                         |                                                                                                                                |
| Basolateral |           | <b>TL</b> | <b>TD</b> | <b>TH</b> | <b>ps=0.011</b><br>pt=0.935<br>pi=0.365 | Spatial smoothing (across all temporal smoothing setting):<br>SD-SH: 1.0 (95%CI:0.6 to 1.4)                                    |
|             | <b>SL</b> | -12.6±4.0 | -12.6±4.0 | -12.6±4.0 |                                         |                                                                                                                                |
|             | <b>SD</b> | -12.5±3.7 | -12.4±3.7 | -12.4±3.7 |                                         |                                                                                                                                |
|             | <b>SH</b> | -13.4±3.5 | -13.4±3.5 | -13.4±3.5 |                                         |                                                                                                                                |

CI: Confidence Interval; pi: p-value for interaction between spatial and temporal smoothing;  
ps: p-value for spatial smoothing; pt: p-value for temporal smoothing; TD: Temporal smoothing default; TH: Temporal smoothing high; TL: Temporal smoothing low; SD: Spatial smoothing default; SH: Spatial smoothing high; SL: Spatial smoothing low  
\*The difference between the segments was less than 0.1%. yet still statistically significant.

**Supplementary table 4: Effect of smoothing on epicardial longitudinal strain**

| Segment     | Complete set of strain values at all combinations of spatial and temporal smoothing (%) |           |           |           | P values for overall effects of smoothing (p≤0.05 highlighted in bold type) | Statistically significant mean changes in strain (%) with changing spatial and temporal smoothing settings, alongside 95% confidence intervals of these mean differences. Non-significant changes not included.                                                                                                                                                                                                                                                                                                                                                                                                                                                                        |
|-------------|-----------------------------------------------------------------------------------------|-----------|-----------|-----------|-----------------------------------------------------------------------------|----------------------------------------------------------------------------------------------------------------------------------------------------------------------------------------------------------------------------------------------------------------------------------------------------------------------------------------------------------------------------------------------------------------------------------------------------------------------------------------------------------------------------------------------------------------------------------------------------------------------------------------------------------------------------------------|
| Basoseptal  |                                                                                         | <b>TL</b> | <b>TD</b> | <b>TH</b> | <b>ps&lt;0.001</b><br>pt=0.124<br><b>pi=0.009</b>                           | Spatial smoothing (temporal smoothing low)<br>SL-SD:-2.2(95%CI:-2.9 to -1.4)<br>SL-SH:-1.6(95%CI:-2.5 to -0.8)<br>SD-SH: 0.5(95%CI:0.8 to 0.3)<br>Spatial smoothing (temporal smoothing default)<br>SL-SD: -2.2(95%CI:-2.9 to -1.5)<br>SL-SH: -1.7(95%CI:-2.5 to -0.9)<br>SD-SH: 0.5(95%CI:0.8 to 0.3)<br>Spatial smoothing (temporal smoothing default)<br>SL-SD: -2.3(95%CI:-3.0 to -1.5)<br>SL-SH: -1.7(95%CI:-2.5 to -0.9)<br>SD-SH: 0.5(95%CI:0.3 to 0.8)<br>Temporal smoothing (spatial smoothing default)<br>TL-TH:-0.1(95%CI:-0.2 to 0.0)<br>TD-TH*<br>Temporal smoothing (spatial smoothing high)<br>TL-TD:-0.1(95%CI:-0.1 to 0.0)<br>TL-TH:-0.1(95%CI:-0.1 to 0.0)<br>TD-TH* |
|             | <b>SL</b>                                                                               | -18.0±3.7 | -18.0±3.6 | -18.0±3.6 |                                                                             |                                                                                                                                                                                                                                                                                                                                                                                                                                                                                                                                                                                                                                                                                        |
|             | <b>ST</b>                                                                               | -15.8±3.1 | -15.8±3.1 | -15.8±3.1 |                                                                             |                                                                                                                                                                                                                                                                                                                                                                                                                                                                                                                                                                                                                                                                                        |
|             | <b>SH</b>                                                                               | -16.4±3.0 | -16.3±3.0 | -16.3±3.0 |                                                                             |                                                                                                                                                                                                                                                                                                                                                                                                                                                                                                                                                                                                                                                                                        |
|             |                                                                                         |           |           |           |                                                                             |                                                                                                                                                                                                                                                                                                                                                                                                                                                                                                                                                                                                                                                                                        |
| Midseptal   |                                                                                         | <b>TL</b> | <b>TD</b> | <b>TH</b> | <b>ps=0.013</b><br>pt=0.219<br>pi=0.403                                     | Spatial smoothing (across all temporal smoothing setting):<br>SL-SD: 0.8 (95%CI:0.3 to 1.4)                                                                                                                                                                                                                                                                                                                                                                                                                                                                                                                                                                                            |
|             | <b>SL</b>                                                                               | -17.6±2.9 | -17.6±2.9 | -17.6±2.9 |                                                                             |                                                                                                                                                                                                                                                                                                                                                                                                                                                                                                                                                                                                                                                                                        |
|             | <b>ST</b>                                                                               | -18.5±2.6 | -18.4±2.6 | -18.4±2.6 |                                                                             |                                                                                                                                                                                                                                                                                                                                                                                                                                                                                                                                                                                                                                                                                        |
|             | <b>SH</b>                                                                               | -18.2±2.7 | -18.2±2.7 | -18.2±2.7 |                                                                             |                                                                                                                                                                                                                                                                                                                                                                                                                                                                                                                                                                                                                                                                                        |
| Apicoseptal |                                                                                         | <b>TL</b> | <b>TD</b> | <b>TH</b> | <b>ps&lt;0.001</b><br>pt=0.413<br><b>pi=0.041</b>                           | Spatial smoothing (temporal smoothing low)<br>SL-SD:-2.8(95%CI:-3.7 to -1.9)<br>SL-SH:-4.4(95%CI:-5.6 to -3.2)<br>SD-SH: -1.6(95%CI:-1.9 to -1.3)<br>Spatial smoothing (temporal smoothing low)<br>SL-SD:-2.8(95%CI:-3.7 to -1.9)<br>SL-SH:-4.4(95%CI:-5.6 to -3.3)<br>SD-SH: -1.6(95%CI:-1.9 to -1.3)<br>Spatial smoothing (temporal smoothing low)<br>SL-SD:-2.8(95%CI:-3.7 to -1.9)<br>SL-SH:-4.4(95%CI:-5.6 to -3.3)<br>SD-SH: -1.6(95%CI:-1.9 to -1.3)<br>Spatial smoothing (temporal smoothing low)<br>SL-SD:-2.8(95%CI:-3.7 to -1.9)<br>SL-SH:-4.4(95%CI:-5.6 to -3.3)                                                                                                          |
|             | <b>SL</b>                                                                               | -23.9±4.0 | -23.9±4.0 | -23.9±3.9 |                                                                             |                                                                                                                                                                                                                                                                                                                                                                                                                                                                                                                                                                                                                                                                                        |
|             | <b>ST</b>                                                                               | -21.1±4.9 | -21.1±4.9 | -21.1±4.8 |                                                                             |                                                                                                                                                                                                                                                                                                                                                                                                                                                                                                                                                                                                                                                                                        |
|             | <b>SH</b>                                                                               | -19.5±5.1 | -19.5±5.1 | -19.5±5.1 |                                                                             |                                                                                                                                                                                                                                                                                                                                                                                                                                                                                                                                                                                                                                                                                        |
|             |                                                                                         |           |           |           |                                                                             |                                                                                                                                                                                                                                                                                                                                                                                                                                                                                                                                                                                                                                                                                        |

|              |           |           |           |           |                                                                                 |                                                                                                                              |
|--------------|-----------|-----------|-----------|-----------|---------------------------------------------------------------------------------|------------------------------------------------------------------------------------------------------------------------------|
|              |           |           |           |           |                                                                                 | SD-SH: -1.6(95%CI:-1.9 to -1.3)<br>Temporal smoothing (spatial smoothing high)<br>TL-TD*                                     |
| Apicolateral |           | <b>TL</b> | <b>TD</b> | <b>TH</b> | p <sub>s</sub> =0.111<br>p <sub>t</sub> =0.131<br>p <sub>i</sub> =0.759         |                                                                                                                              |
|              | <b>SL</b> | -19.3±3.4 | -19.3±3.4 | -19.3±3.4 |                                                                                 |                                                                                                                              |
|              | <b>ST</b> | -19.8±4.0 | -19.7±4.0 | -19.7±3.9 |                                                                                 |                                                                                                                              |
|              | <b>SH</b> | -19.0±4.3 | -18.9±4.3 | -18.9±4.3 |                                                                                 |                                                                                                                              |
| Midlateral   |           | <b>TL</b> | <b>TD</b> | <b>TH</b> | p <sub>s</sub> = <b>0.016</b><br>p <sub>t</sub> =0.063<br>p <sub>i</sub> =0.418 | Spatial smoothing (across all temporal smoothing setting):<br>SL-SH: 1.1 (95%CI:0.0 to 2.2)<br>SD-SH: 0.6 (95%CI:0.1 to 1.1) |
|              | <b>SL</b> | -15.3±4.0 | -15.2±4.1 | -15.2±4.1 |                                                                                 |                                                                                                                              |
|              | <b>ST</b> | -15.8±3.1 | -15.8±3.1 | -15.8±3.1 |                                                                                 |                                                                                                                              |
|              | <b>SH</b> | -16.4±2.9 | -16.4±2.9 | -16.4±2.9 |                                                                                 |                                                                                                                              |
| Basolateral  |           | <b>TL</b> | <b>TD</b> | <b>TH</b> | p <sub>s</sub> = <b>0.001</b><br>p <sub>t</sub> =0.957<br>p <sub>i</sub> =0.374 | Spatial smoothing (across all temporal smoothing setting):<br>SL-SH: 1.2 (95%CI:0.2 to 2.1)<br>SD-SH: 1.1 (95%CI:0.7 to 1.5) |
|              | <b>SL</b> | -11.7±4.2 | -11.7±4.1 | -11.7±4.1 |                                                                                 |                                                                                                                              |
|              | <b>ST</b> | -11.8±3.7 | -11.7±3.7 | -11.7±3.7 |                                                                                 |                                                                                                                              |
|              | <b>SH</b> | -12.9±3.6 | -12.9±3.6 | -12.9±3.6 |                                                                                 |                                                                                                                              |

p<sub>i</sub>: p-value for interaction between spatial and temporal smoothing; p<sub>s</sub>: p-value for spatial smoothing; p<sub>t</sub>: p-value for temporal smoothing; TD: Temporal smoothing default; TH: Temporal smoothing high; TL: Temporal smoothing low; SD: Spatial smoothing default; SH: Spatial smoothing high; SL: Spatial smoothing low

\*The difference between the segments was less than 0.1%. yet still statistically significant.
